# Supplementary material
Source: PubMed Central journal article supplement (PMC7172475)
Supplement: mmc1.pdf [file mmc1.pdf]

## **Supplemental Information**

### **Entry of Bunyaviruses into Mammalian Cells**

**Pierre-Yves Lozach, Roberta Mancini, David Bitto, Roger Meier,  
Lisa Oestereich, Anna K. Överby, Ralf F. Pettersson, and Ari Helenius**

## **Inventory of Supplemental Information**

### **Supplemental Data Figures**

Sup 1 shows the FACS-based infection assay developed for UUKV which has been used to determine the length of the virus cycle and also to assess the effect of all the perturbants tested in this study. Sup 1 is related to Fig 3, 4, 5, 6, 7 and Sup 4, 5, 6 and Sup Table 1.

Sup 2 is related to Fig 1, 2, 3, 4, 5 and 7.

Sup 3 is related to Fig 3.

Sup 4 shows pH dependence of UUKV infectious entry. Sup 4 is related to Fig 3, 5, 6 and Sup 6.

Sup 5 is related to Fig 4, 7 and Sup 4.

Sup 6 is related to Fig 5.

### **Supplemental Data Table**

Sup Table 1 gives a list of cells tested for UUKV infection and shows why authors decided to utilize A549, BHK-21 and BSC40 cells for this study.

### **Supplemental Data Movies**

Sup Movie 1 is related to Fig 4.

Sup Movie 2 is related to Fig 7.

Sup Movie 3 is related to Fig 7.

### **Supplemental Data Legends**

### **Supplemental Experimental Procedures**

### **Supplemental References**

**A**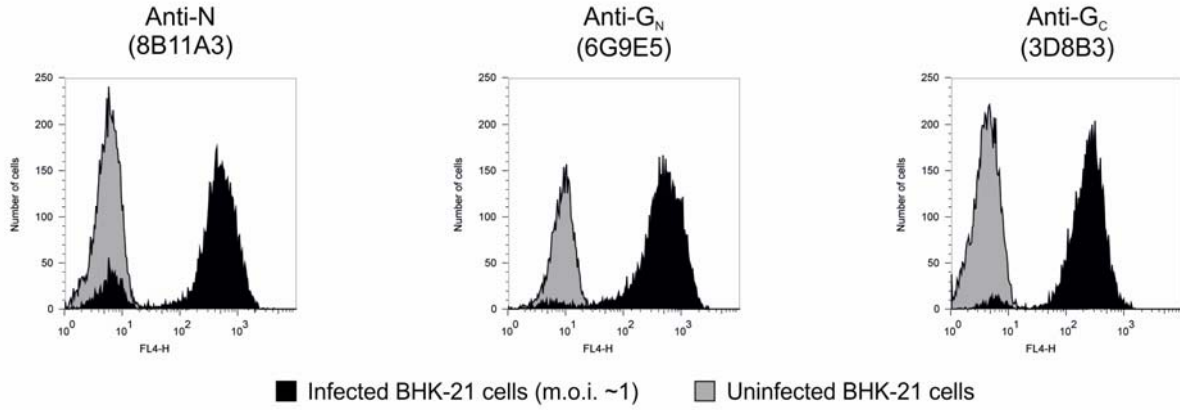**B**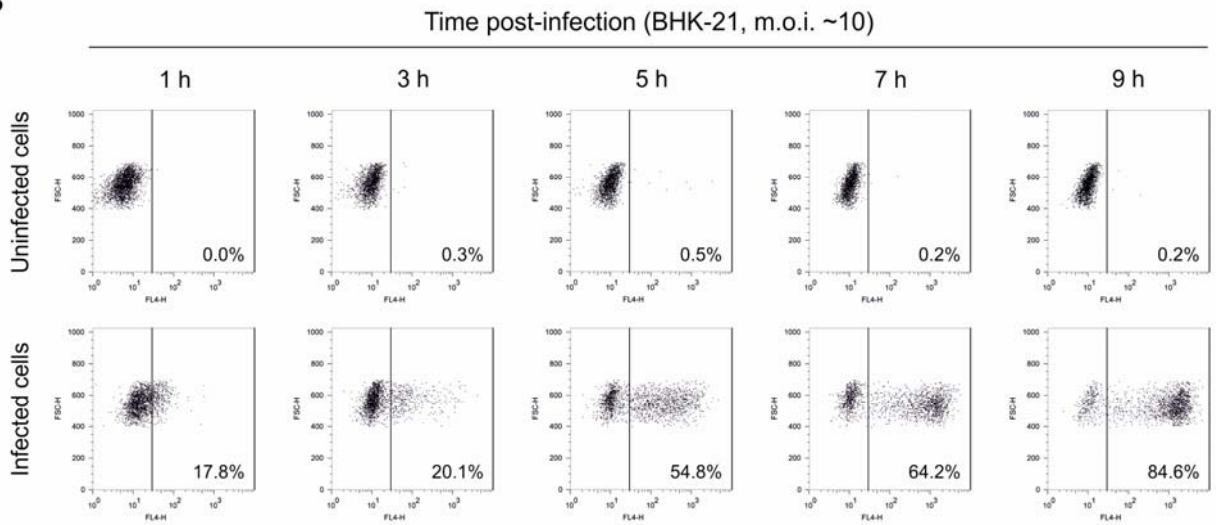**C**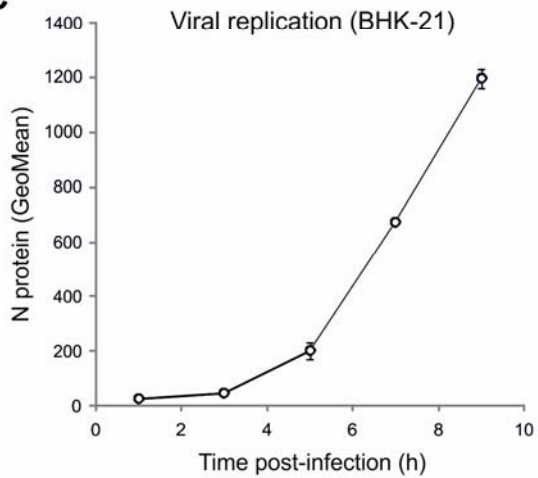**D**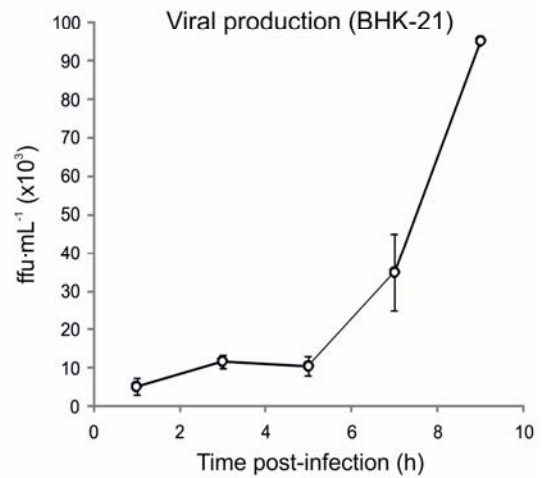

### **Figure S1. Quantification of UUKV infection by flow cytometry**

(A) Cells were exposed to UUKV and harvested 18 h later. The infected cells were fixed, permeabilized, and stained with monoclonal antibodies against the nucleoprotein N or the glycoproteins G<sub>N</sub> and G<sub>C</sub> before FACS analysis.

(B) UUKV infection was monitored over 9 h with the FACS-based infection assay described in A. The infections are given as a percentage of N protein-positive cells according to the threshold determined for the uninfected cells. The fraction of N protein-positive cells increased over time with the accumulation of newly synthesized N protein. This indicates that the signal detected corresponded to viral replication and not to input particles.

(C) Shows the same data as in B but the infection is given as the total fluorescence associated with the cells. The total fluorescence associated with cells, due to N protein expression, clearly indicated that infected cells expressed a low level of N within the three first hours. Error bars indicate SD.

(D) Supernatants collected during the time course in B were assessed for the production of new infectious viral particles. As UUKV is not lytic, the titers were determined using an infectious focus assay after immunostaining with a polyclonal antibody against all UUKV proteins. Error bars indicate SD.

**A**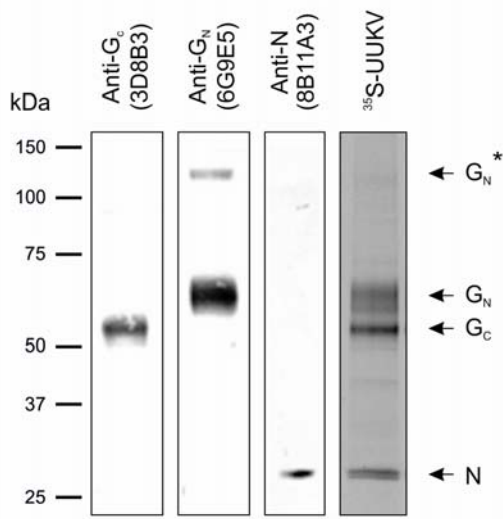**B**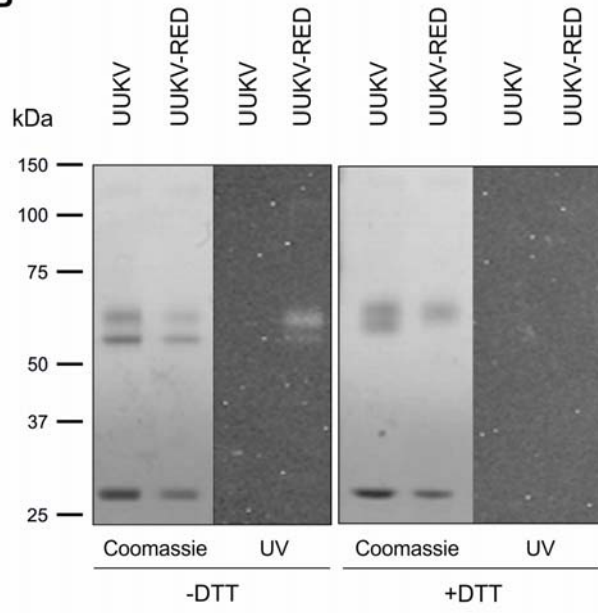**C**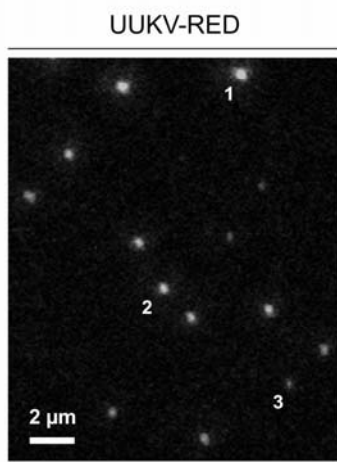**D**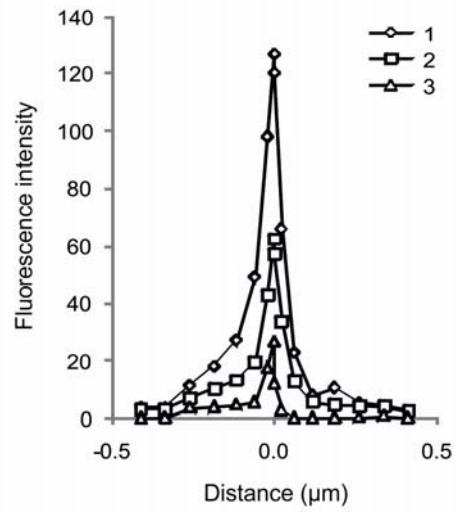**E**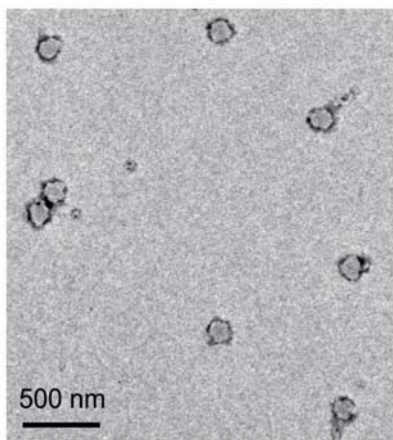**F**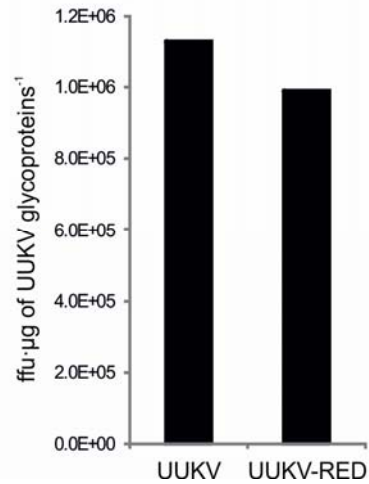

## Figure S2. Labeling of UUKV with [<sup>35</sup>S] or fluorescent dye

(A) <sup>35</sup>S-labeled particles (<sup>35</sup>S-UUKV) were analyzed by non-reducing SDS-PAGE and the purity assessed by autoradiography (fourth panel). The specificity was controlled by western blotting using monoclonal antibodies against the nucleoprotein N and the glycoproteins G<sub>N</sub> and G<sub>C</sub>. G<sub>N</sub><sup>\*</sup> indicates oligomers of G<sub>N</sub>.

(B) UUKV was labeled with a thiosulfate-activated fluorescent dye at a 1:5 molar ratio between UUKV glycoproteins and dye. The unlabeled (UUKV) and fluorescent particles (UUKV-RED) were analyzed by non-reducing (-dithiothreitol [DTT]) and reducing (+DTT) SDS-PAGE with blue staining (Coomassie) or fluorography (UV). The glycoproteins of UUKV-RED were the only fluorescently labeled proteins. In reducing conditions (DTT or TCEP), the fluorescent dye was completely removed. Note that contrary to non-reduced samples, G<sub>N</sub> and G<sub>C</sub> co-migrated in SDS-PAGE after reduction.

(C) Confocal microscopy pictures of UUKV-RED show individual fluorescent spots of different intensities (1 to 3) with a diameter of 0.3 to 0.5 μm.

(D) The distribution of the relative fluorescence intensity of one spot fits a Gaussian function (fit is calculated using the central limit theorem equation). The relative fluorescence intensity distributions for three different spots are shown (1 to 3). The distributions of the signal suggest that the light was emitted from single particles.

(E) Unfixed UUKV-RED particles negatively stained with phosphotungstic acid under neutral pH conditions viewed by EM. Pictures show isolated particles. As already described for some other bunyaviruses (Schmaljohn and Nichol, 2007), the viruses appeared pleiomorphic in shape and homogenous in terms of size (132 +/- 8 nm, n=8).

(F) The fluorescent particles were as infectious as unlabeled particles. The titers of UUKV and UUKV-RED were normalized according to the amount of glycoproteins G<sub>N</sub> and G<sub>C</sub> (foci forming units [ffu] per μg of glycoproteins). Furthermore, we noticed no impact of <sup>35</sup>S-labeling on UUKV

infectivity; the titers were similar to those of non-radioactive particles (about  $10^9$  to  $10^{10}$  ffu·mL<sup>-1</sup> after concentration and purification) (data not shown).

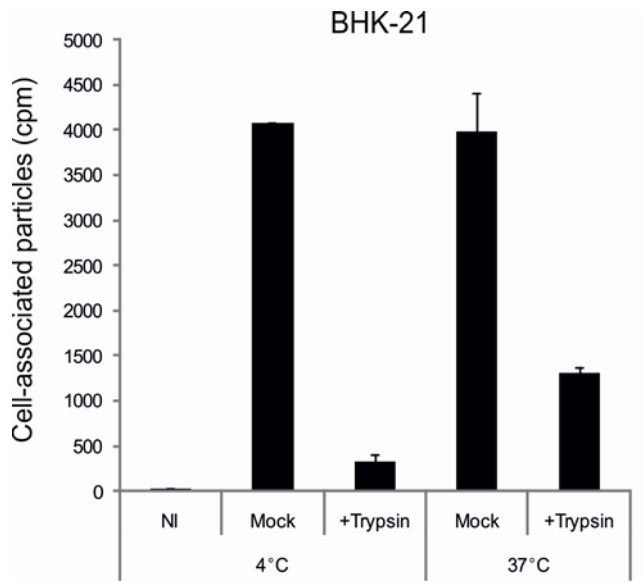

**Figure S3. <sup>35</sup>S-virus-based internalization assay**

<sup>35</sup>S-labeled UUKV (m.o.i. ~3) was bound to cells on ice. Cells were then washed to remove unbound material and maintained on ice or shifted to 37°C before treatment with trypsin for 1 h at 4°C to remove cell-surface bound viruses. NI for non-infected cells. Error bars indicate SD.

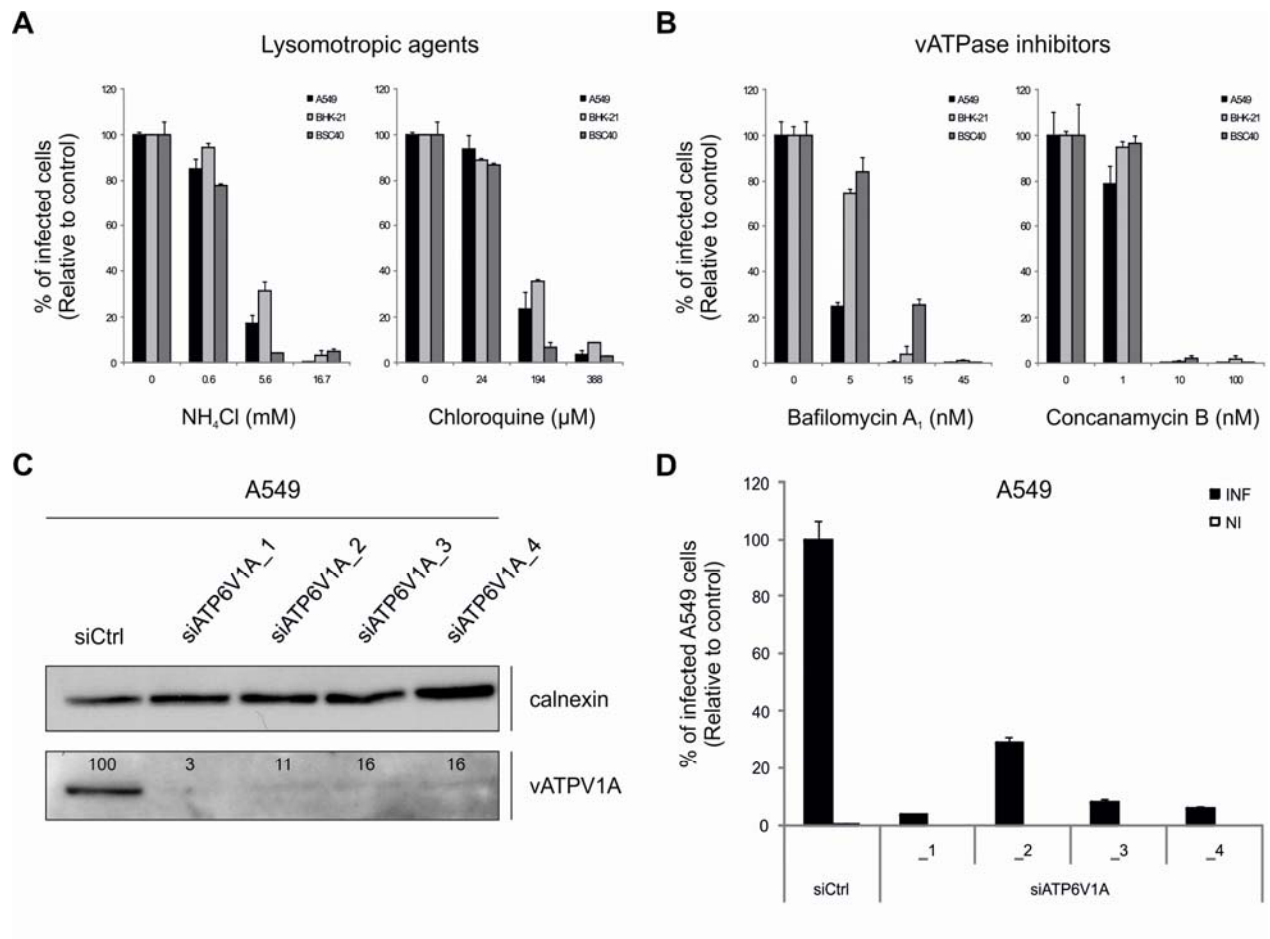

**Figure S4. UUKV infects cells in a pH-dependent manner**

(A and B) Cells were pre-treated with pH interfering drugs at varying concentrations and then infected with UUKV in the presence of the drugs (NH<sub>4</sub>Cl and chloroquine in panel A, and bafilomycin A1 and concanamycin B in panel B). Data are normalized to samples where the inhibitors had been omitted. Error bars indicate SD.

(C) Efficiency of vATP6V1A knockdown assayed by western blotting. vATP6V1A protein levels are expressed as percentages of vATP6V1A levels in cells treated with vATP6V1A siRNAs (siATP6V1A\_1 to \_4) normalized to level of calnexin and vATP6V1A level in control cells treated with negative-control siRNA (siCtrl).



(D) Cells treated with vATPV1A siRNAs were infected with UUKV (m.o.i. ~2). The quantification of infection was performed as described in Figure 3E. NI and INF for non- and infected cells respectively. Error bars indicate SD.

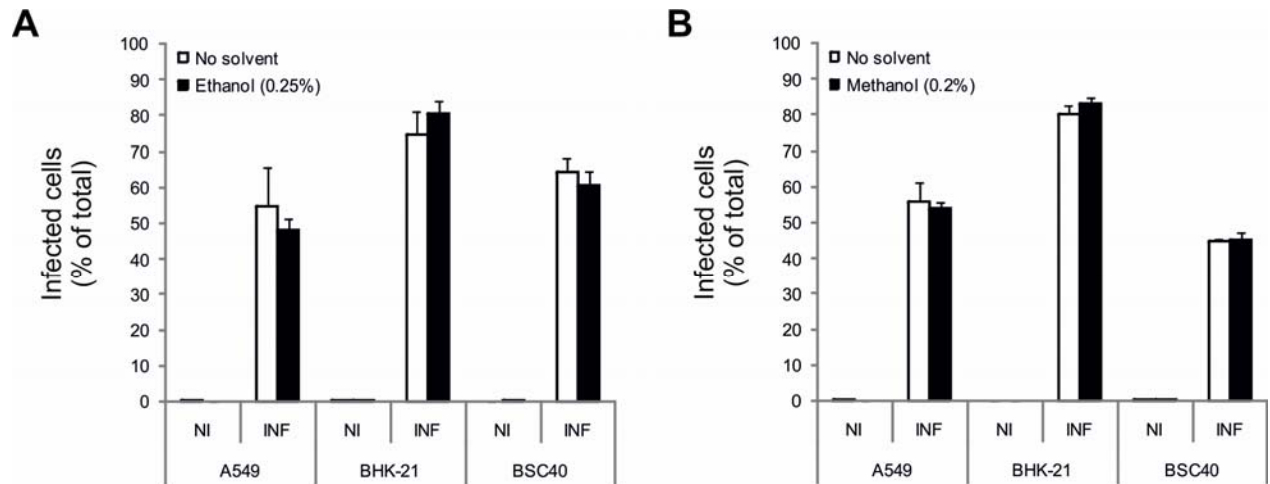

**Figure S5. Low concentration of solvents has no effect on UUKV infection**

(A and B) Cells were pre-treated with ethanol (A) or methanol (B), at the highest final concentrations used for drug assays in this study, and then infected with UUKV in the presence of these solvents. NI and INF for non- and infected cells respectively. Error bars indicate SD.

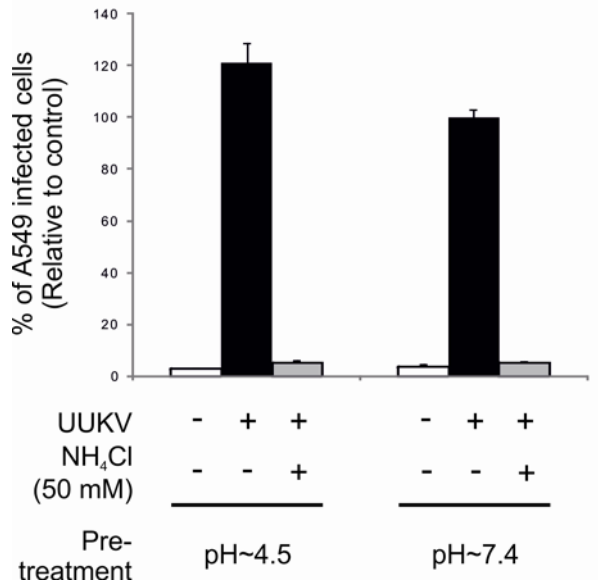

**Figure S6. NH<sub>4</sub>Cl efficiently blocks UUKV infection in low-pH treated cells**

To assess the capacity of cells to replicate virus and of NH<sub>4</sub>Cl to block penetration after very low pH treatment, cells were incubated in buffer at low pH for 1.5 min and then exposed to UUKV (m.o.i. ~1) in the presence or absence of NH<sub>4</sub>Cl (50 mM) for 1 h at 37°C. The values were normalized to samples treated at pH ~7.4 where NH<sub>4</sub>Cl had been omitted. Error bars indicate SD.

**Table S1. Cells infected by UUKV**

| <b>Cell line</b> | <b>Specie</b> | <b>Tissue</b>      | <b>Sensitivity to UUKV infection<sup>a</sup></b> | <b>Production of new viral particles<sup>b</sup></b> |
|------------------|---------------|--------------------|--------------------------------------------------|------------------------------------------------------|
| <b>3T3</b>       | Mouse         | Fibroblast         | -                                                | -                                                    |
| <b>A431</b>      | Human         | Skin               | +                                                | ND                                                   |
| <b>A549</b>      | Human         | Lung               | ++                                               | ++                                                   |
| <b>AP61</b>      | Mosquito      | Larva (whole)      | -                                                | -                                                    |
| <b>BHK-21</b>    | Hamster       | Kidney             | +++                                              | +++                                                  |
| <b>BSC40</b>     | Monkey        | Kidney             | ++                                               | +                                                    |
| <b>C6/36</b>     | Mosquito      | Larva (whole)      | -                                                | -                                                    |
| <b>CHO</b>       | Hamster       | Ovary              | ++                                               | ++                                                   |
| <b>CV1</b>       | Monkey        | Kidney             | +                                                | ND                                                   |
| <b>HEK-293T</b>  | Human         | Kidney             | ++                                               | ND                                                   |
| <b>HeLa</b>      | Human         | Cervical carcinoma | +                                                | -                                                    |
| <b>Huh-7</b>     | Human         | Hepatocarcinoma    | ++                                               | ND                                                   |
| <b>raji</b>      | Human         | B lymphocyte       | -                                                | _*                                                   |
| <b>THP1</b>      | Human         | Monocyte           | -                                                | _*                                                   |
| <b>Vero</b>      | Monkey        | Kidney             | ++                                               | +                                                    |

<sup>a</sup> The sensitivity of cells to UUKV infection is based on the infection index at 18 hours post-infection (m.o.i. ~1) as follow: +++ superior to 30%, ++ from 10% to 30%, + from 1% to 10%, - inferior to 1%. The infection index was determined by quantification of N-positive cells using the FACS-based analysis described in Supplement 1B.

<sup>b</sup> The production of new viral particles was determined by foci assay and is given according to the size of foci 72 h post-infection as follow: +++ superior to 1 mm, ++ from 0.5 to 1 mm, + inferior to 0.5 mm, - no foci. ND for not determined.

\* raji and THP1 are non adherent cells. Consequently, production of new infectious particles was assessed by titration of infected-cell supernatant.

## SUPPLEMENTAL EXPERIMENTAL PROCEDURES

### Viruses, siRNA, antibodies, plasmids and inhibitors

GFP-recombinant VSV and the prototype strains of influenza A X-31 and Semliki forest viruses have been described previously (Helenius et al., 1980; Kilbourne, 1969; Schnell et al., 1996). SFV and VSV were kindly provided by T. Heger and H.K. Johannsdottir. CHC siRNAs (siCHC\_1, SI02651747; siCHC\_2, SI00299873) and vATPV1A siRNAs (siATP6V1A\_1, SI00307489; siATP6V1A\_2, SI00307496; siATP6V1A\_3, SI00307503; siATP6V1A\_4, SI00307510) were all from Qiagen. AllStars negative-control siRNA (Qiagen) was used as control siRNA (siCtrl). Mouse antibodies 6G9E5 and 3D8B3 are directed against conformation-dependent epitopes in the glycoproteins G<sub>N</sub> and G<sub>C</sub>, respectively (Persson and Pettersson, 1991). Mouse antibody 8B11A3 is directed against a linear epitope in the N protein (Persson and Pettersson, 1991). The polyclonal rabbit antibody U5 is directed against all viral proteins (Kuismanen et al., 1982). A polyclonal rabbit antibody against all viral proteins of SFV and a monoclonal mouse antibody against the influenza A virus nucleoprotein were used to detect viral replication. Mouse antibody against CHC (clone 23) and chicken antibody against vATPV1A (ATP6V1A) were purchased from Thermo Scientific and Becton Dickinson, respectively. Mouse antibodies against  $\beta$ -actin and  $\alpha$ -tubulin were purchased from Sigma. The polyclonal rabbit anti-calnexin antibody was described previously (Hammond et al., 1994). Plasmids encoding EGFP-LAMP-1, EGFP-Rab5a, EGFP-Rab5a S34N, EGFP-Rab5a Q79L, EGFP-Rab7a, EGFP-Rab7a T22N and EGFP-Rab7a Q67L have all been described previously (Pelkmans et al., 2004; Falcon-Perez et al., 2005). Plasmid coding for PH-PLC $\Delta$ 1EGFP was kindly providing by J. Mercer. NH<sub>4</sub>Cl and chloroquine (Sigma) stocks were dissolved in water, colcemid and MG132 (Sigma) in methanol, and bafilomycin A1 (Sigma), wortmannin (Sigma) and concanamycin B (Alexis) in absolute ethanol.

Note that dimethyl sulfoxide (DMSO) was not used as solvent for drugs in this study because by itself, it reduced UUKV infection (data not shown).

### **Production, purification and labeling of UUKV**

Sub-confluent monolayers of BHK-21 cells were exposed to UUKV for 1 h in FCS-free medium at a multiplicity of 0.1 ffu·cell<sup>-1</sup>, washed and then incubated at 37°C in FCS-free medium for 48 h. For the production of <sup>35</sup>S-labeled UUKV, DMEM (without methionine and cysteine) was used as culture medium and supplemented with 100 µCi·mL<sup>-1</sup> of [<sup>35</sup>S] cysteine and methionine (Pro-Mix <sup>35</sup>S, Amersham Biosciences). Supernatants containing virus were clarified and subsequently centrifuged for 2 h at 100,000 g through a 30% sucrose cushion made in TNE buffer (10 mM Tris-HCl, pH~7.4 containing 100 mM NaCl and 2 mM EDTA). The virus pellet was resuspended in TNE buffer. For the production of fluorescent particles, the glycoproteins concentration was measured and C5-thiosulfate-activated fluorescent dye (TS-link Bodipy TR, Invitrogen) was added in a 1:5 molar ratio while vortexing. Both <sup>35</sup>S- and fluorescent-labeled particles were banded in a 5% to 45% Optiprep iodixanol density gradient (Sigma) made in TNE buffer and complemented with 8.6% sucrose.

### **Virus titration**

Virus was titered on cells by focus immuno-detection assay as described elsewhere for other viruses (Lozach et al., 2005). Briefly, following infection of confluent monolayers with 10-fold dilutions of UUKV in FCS-free medium, cells were grown in presence of medium containing 2% FCS and supplemented with 0.6% carboxymethyl-cellulose to abolish virus spread. Foci were detected by immunostaining with the antibody U5.

## Protein analysis

For western blotting, viral protein extracts from purified-virus stock, and protein extracts from siRNA-treated cells, were analyzed by SDS-PAGE (NuPAGE Novex Bis-Tris gels, Invitrogen) and transferred to Immobilon P membranes (Millipore). Incubation with primary antibodies 8B11A3, 6G9E5, 3D8B3 ( $1 \mu\text{g}\cdot\text{mL}^{-1}$ ) or against CHC (1:100) and  $\beta$ -actin (1:1,000) was followed by incubation with an anti-mouse horseradish peroxidase-conjugated secondary antibody (1:2,000). Incubation with primary antibodies against vATPV1A (1:2,500) and calnexin (1:20,000) was followed by incubation with an anti-chicken and anti-rabbit horseradish peroxidase-conjugated secondary antibodies (1:2,500 and 1:10,000), respectively. Bound antibodies were detected by exposure to enhanced chemiluminescence reagents (ECL+, Amersham Biosciences). For  $^{35}\text{S}$ -UUKV proteins analysis, samples were separated by SDS-PAGE and gels were fixed, dried, and exposed to SuperRX film (Fujifilm). For fluorescent-labeled UUKV, proteins were separated by SDS-PAGE and subsequently were either exposed to UV (fluorography) or fixed and stained with Coomassie blue solution (50% methanol 10% acetic acid 0.25% Serva Blue G [Serva]).

## Cell-cell fusion assay

Virus binding (m.o.i.  $\sim 1,000$ ) was synchronized on ice. Virus-bound cells were subsequently incubated for 5 min at  $37^\circ\text{C}$  in RPMI1640 0.2% BSA buffered at varying pH with either 30 mM HEPES (pH $\sim 7.0$  to 7.5), 30 mM 2-(N-morpholino)ethanesulfonic acid (MES) (pH $\sim 5.5$  to 6.5) or 30 mM citric acid (pH $\sim 4.5$  to 5.25). Subsequently, cells were extensively washed and then incubated in complete medium (pH $\sim 7.4$ ) at  $37^\circ\text{C}$  for 3 h before fixation and permeabilization with 0.1% Triton X-100 (Sigma). Nuclei and cytoplasm were stained for 30 min at room temperature with bisbenzimidazole (0.2  $\mu\text{g}\cdot\text{mL}^{-1}$ , Invitrogen) and CellMask Deep Red (1:5,000, Invitrogen), respectively. Syncytia were monitored by fluorescence microscopy as described above. Fusion was quantified by counting the number of cells and nuclei present in a microscope field after



fusion. A fusion index ( $f$ ) was computed according to the equation  $f = (1 - [c/n])$ , where  $c$  is the number of cells in a field after fusion and  $n$  the number of nuclei. An average field contained 250 to 350 nuclei.

### **Plasma membrane-virus fusion assay**

UUKV was fused at the plasma membrane as previously described (Helenius et al., 1980). Briefly, virus binding (m.o.i. ~5 for A549 cells, 30 for BHK-21 and 10 for BSC40) was synchronized on ice, and then, virus-bound cells were treated with buffers at different pH for 1.5 min as described for the cell-cell fusion assay. Following pH treatment, cells were extensively washed on ice and then incubated in complete medium (pH~7.4) supplemented with  $\text{NH}_4\text{Cl}$  (50 mM) at indicated temperatures for either 7 h (A549 and BHK-21 cells) or 18 h (BSC40 cells).

### **Immunofluorescence staining**

For assessing microtubule disorganization, cells treated 3 h on ice with colcemid (10  $\mu\text{M}$ ) were fixed using medium containing 4% formaldehyde, permeabilized with 0.05% saponin, and then incubated with a primary mouse antibody against  $\alpha$ -tubulin (1:1,000) for 1 h. Cells were then incubated with an anti-mouse Alexa Fluor 488-conjugated secondary antibody (1:500, Molecular Probes) for 45 min. Cover slips were mounted with ImmuMount from Thermo Shandon (Pittsburgh, Pennsylvania, United States) and analyzed by confocal microscopy as described in the experimental procedures part.

### **DNA transfection**

Cells were transfected with plasmids using Lipofectamine 2000 (Invitrogen) according to the manufacturer's instructions either in 24w-plates or in 8w-chamber Lab-Tek II (Nalge Nunc).

### **siRNA-mediated knockdown**

Transfections for siRNA silencing were performed using Interferin transfection reagent (Polyplus) according to the manufacturer's forward protocol. Briefly, A549 cells in 24w-plates were seeded one day prior to transfection. The siRNAs (20 nM) were diluted in FCS-free medium and then, together with Interferin (3  $\mu$ L), added to the cells. For siATP6V1A\_1 to \_4, cells were infected 72 h post-transfection. For siCHC\_1 and \_2, 48 h post-transfection, cells were re-transfected, and incubated for an additional 48 h before infection. Knockdown was verified by Western blotting using  $\beta$ -actin and calnexin for normalization.

### **Flow Cytometry assays**

As previously described (Quirin et al., 2008), infected cells were fixed and then permeabilized with a saponin-based buffer to stain intracellular viral antigens with antibodies. Briefly, permeabilized cells were incubated with primary antibody (1  $\mu$ g.mL<sup>-1</sup>) for 1 h, washed, and subsequently exposed to an anti-mouse or an anti-rabbit Alexa Fluor 647-conjugated secondary antibody (1:500, Molecular Probes) for 45 min. The infection index was determined by FACS analysis with a FACS Calibur cytometer (Becton Dickinson) and using Flowjo software (Treestar).

## SUPPLEMENTAL REFERENCES

Falcon-Perez, J.M., Nazarian, R., Sabatti, C., and Dell'Angelica, E.C. (2005). Distribution and dynamics of Lamp1-containing endocytic organelles in fibroblasts deficient in BLOC-3. *J Cell Sci* 118, 5243-5255.

Hammond, C., Braakman, I., and Helenius, A. (1994). Role of N-linked oligosaccharide recognition, glucose trimming, and calnexin in glycoprotein folding and quality control. *Proc Natl Acad Sci U S A* 91, 913-917.

Kilbourne, E.D. (1969). Future influenza vaccines and the use of genetic recombinants. *Bull World Health Organ* 41, 643-645.

Kuismanen, E., Hedman, K., Saraste, J., and Pettersson, R.F. (1982). Uukuniemi virus maturation: accumulation of virus particles and viral antigens in the Golgi complex. *Mol Cell Biol* 2, 1444-1458.

Lozach, P.Y., Burleigh, L., Staropoli, I., Navarro-Sanchez, E., Harriague, J., Virelizier, J.L., Rey, F.A., Despres, P., Arenzana-Seisdedos, F., and Amara, A. (2005). Dendritic cell-specific intercellular adhesion molecule 3-grabbing non-integrin (DC-SIGN)-mediated enhancement of dengue virus infection is independent of DC-SIGN internalization signals. *J Biol Chem* 280, 23698-23708.

Pelkmans, L., Burli, T., Zerial, M., and Helenius, A. (2004). Caveolin-stabilized membrane domains as multifunctional transport and sorting devices in endocytic membrane traffic. *Cell* 118, 767-780.

Persson, R., and Pettersson, R.F. (1991). Formation and intracellular transport of a heterodimeric viral spike protein complex. *J Cell Biol* 112, 257-266.

Schnell, M.J., Buonocore, L., Whitt, M.A., and Rose, J.K. (1996). The minimal conserved transcription stop-start signal promotes stable expression of a foreign gene in vesicular stomatitis virus. *J Virol* 70, 2318-2323.
